# Supplementary material for: The nature of stability and adsorption interactions of binary Au–Li clusters with bridge adsorption structures
Source: Royal Society of Chemistry journal article supplement (doi:10.1039/d2cp04716k), 2022-12-15
Supplement: d2cp04716k1.pdf [file d2cp04716k1.pdf]

Electronic Supplementary Information (ESI)

# **The nature of stability and adsorption interactions of binary Au-Li clusters with bridge adsorption structures**

Manli Zhang<sup>a</sup>, Qiyong Zhu<sup>a</sup>, Qiman Liu<sup>\*a</sup>, and Longjiu Cheng<sup>\*b</sup>

<sup>a</sup>School of Chemistry and Materials Engineering, Huainan Normal University, Huainan 232000, P. R. China

<sup>b</sup>Key Laboratory of Structure and Functional Regulation of Hybrid Materials, Anhui University, Hefei 230000, P.R. China

**\*Corresponding author.** E-mail: qimliu@ustc.edu.cn; clj@ustc.edu.cn

(1) The cartesian coordinates of (AuLi)<sub>n</sub> (n = 1-9) clusters

n = 1

|    |           |           |           |
|----|-----------|-----------|-----------|
| Au | 0.000000  | -0.000000 | 0.083272  |
| Li | -0.000000 | 0.000000  | -2.192832 |

n = 2

|    |           |           |           |
|----|-----------|-----------|-----------|
| Au | 2.053730  | 0.000000  | -0.000001 |
| Au | -2.053732 | -0.000001 | -0.000001 |
| Li | 0.000000  | 1.355106  | 0.000027  |
| Li | 0.000039  | -1.355089 | 0.000027  |

n = 3

|    |           |           |           |
|----|-----------|-----------|-----------|
| Au | 1.095869  | 1.891130  | 0.000005  |
| Au | -2.283798 | -0.003624 | -0.000000 |
| Au | 1.102525  | -1.887635 | -0.000005 |
| Li | 2.640686  | 0.004457  | -0.000049 |
| Li | -0.195800 | -0.000734 | 1.304317  |
| Li | -0.195905 | -0.000341 | -1.304266 |

n = 4

|    |           |           |           |
|----|-----------|-----------|-----------|
| Au | -2.413129 | 0.252584  | -0.568192 |
| Au | 1.050484  | 2.250541  | 0.183802  |
| Au | 0.219963  | -1.198298 | 2.171445  |
| Au | 1.142666  | -1.304830 | -1.787056 |
| Li | -0.776741 | -1.665168 | -0.137074 |
| Li | -0.845115 | 0.965895  | 1.321776  |
| Li | 1.785815  | -0.187053 | 0.421331  |
| Li | -0.163539 | 0.886376  | -1.606028 |

n = 5

|    |           |           |           |
|----|-----------|-----------|-----------|
| Au | 1.878229  | -1.923295 | -0.623716 |
| Au | 1.923991  | 1.877529  | -0.623706 |
| Au | 0.000138  | -0.000119 | 2.393049  |
| Au | -1.924136 | -1.877572 | -0.623683 |
| Au | -1.878220 | 1.923457  | -0.623517 |
| Li | -0.027080 | -2.241188 | 0.933572  |
| Li | 2.241448  | -0.026998 | 0.934605  |
| Li | -0.000139 | -0.000157 | -1.061755 |
| Li | 0.027113  | 2.241269  | 0.933687  |
| Li | -2.241404 | 0.027062  | 0.934653  |

n = 6

|    |           |           |           |
|----|-----------|-----------|-----------|
| Au | -2.596949 | -2.077120 | -0.002244 |
| Au | 0.000607  | -0.005087 | 2.167618  |
| Au | -2.592169 | 2.081447  | 0.001145  |

|    |           |           |           |
|----|-----------|-----------|-----------|
| Au | -0.000519 | 0.002216  | -2.164385 |
| Au | 2.595849  | 2.078349  | 0.001062  |
| Au | 2.593181  | -2.079867 | -0.003121 |
| Li | -2.454355 | 0.001101  | 1.429546  |
| Li | -0.001399 | -1.576347 | -0.001891 |
| Li | 0.001288  | 1.575047  | 0.003741  |
| Li | -2.457029 | 0.002957  | -1.431041 |
| Li | 2.456032  | 0.000869  | -1.431748 |
| Li | 2.455454  | -0.001993 | 1.429432  |

$n = 7$

|    |           |           |           |
|----|-----------|-----------|-----------|
| Au | 2.549721  | -1.245154 | 2.018020  |
| Au | -0.005589 | -2.622908 | -1.554775 |
| Au | 0.000208  | -0.047422 | -0.207319 |
| Au | 0.006834  | 3.125788  | 1.511829  |
| Au | 2.126675  | 1.006842  | -1.884535 |
| Au | -2.557767 | -1.232978 | 2.015865  |
| Au | -2.120092 | 1.016988  | -1.886509 |
| Li | -0.004991 | -1.673517 | 1.759842  |
| Li | 1.657763  | 1.113502  | 1.350575  |
| Li | 2.178075  | -1.364785 | -0.519679 |
| Li | 0.006078  | 2.425997  | -0.949828 |
| Li | 0.000505  | -0.298762 | -2.800010 |
| Li | -2.183939 | -1.354004 | -0.521450 |
| Li | -1.653215 | 1.121137  | 1.349369  |

$n = 8$

|    |           |           |           |
|----|-----------|-----------|-----------|
| Au | -1.811158 | 2.980450  | 1.255491  |
| Au | -3.270377 | -0.714519 | 0.039311  |
| Au | -0.592553 | 1.348506  | -2.664771 |
| Au | -0.255978 | -0.238545 | -0.090487 |
| Au | 2.736941  | 2.270072  | -0.025607 |
| Au | -0.383909 | -3.190985 | -1.233659 |
| Au | 0.134215  | -1.459249 | 2.716790  |
| Au | 3.502222  | -0.976838 | -0.002092 |
| Li | -2.339616 | 1.559023  | -0.761255 |
| Li | -1.570119 | 0.527383  | 1.982196  |
| Li | 0.255884  | 2.474631  | -0.207592 |
| Li | -1.492931 | -2.400388 | 0.910946  |
| Li | -1.579671 | -1.060384 | -2.120829 |
| Li | 1.436089  | -2.308230 | 0.391416  |
| Li | 1.867420  | 0.358177  | -1.506937 |
| Li | 1.858658  | 0.352301  | 1.444368  |

$n = 9$

|    |           |           |           |
|----|-----------|-----------|-----------|
| Au | -2.959850 | -2.093656 | -0.265666 |
|----|-----------|-----------|-----------|

|    |           |           |           |
|----|-----------|-----------|-----------|
| Au | -0.458906 | 2.168624  | -1.911217 |
| Au | -2.959879 | 2.093911  | -0.263193 |
| Au | -0.458956 | -2.166208 | -1.914033 |
| Au | 0.745798  | 0.000498  | -0.176845 |
| Au | -1.473251 | -0.001954 | 2.921879  |
| Au | 3.260141  | 0.001192  | -1.835578 |
| Au | 2.112539  | 2.218261  | 1.714588  |
| Au | 2.112706  | -2.220653 | 1.712041  |
| Li | -1.831184 | 0.000734  | -1.259662 |
| Li | -0.740980 | 1.802268  | 0.997193  |
| Li | -3.395571 | -0.000793 | 1.136761  |
| Li | 0.752408  | 0.001705  | -2.831870 |
| Li | -0.740631 | -1.803426 | 0.994557  |
| Li | 1.920244  | 2.206353  | -0.932946 |
| Li | 1.919860  | -2.204770 | -0.935315 |
| Li | 1.007662  | -0.001781 | 2.510585  |
| Li | 3.205831  | -0.000681 | 0.795358  |

(2) The cartesian coordinates of (AuLi)<sub>n</sub>-CO (*n* = 1-9) clusters

Bridge adsorptions

*n* = 1

|    |           |           |           |
|----|-----------|-----------|-----------|
| Au | 0.445820  | -0.054050 | 0.000008  |
| Li | -0.707824 | 1.973729  | -0.005168 |
| C  | -1.971707 | 0.414003  | 0.006860  |
| O  | -2.658263 | -0.516905 | -0.003287 |

*n* = 2

|    |           |           |           |
|----|-----------|-----------|-----------|
| Au | 1.833816  | -0.486330 | -0.000063 |
| Au | -2.250547 | 0.079139  | 0.000090  |
| Li | -0.046791 | 1.216406  | -0.001698 |
| Li | -0.420080 | -1.537748 | 0.001274  |
| C  | 1.841333  | 2.127504  | -0.004524 |
| O  | 2.909288  | 2.545891  | 0.003283  |

*n* = 3

|    |           |           |           |
|----|-----------|-----------|-----------|
| Au | -0.336487 | -1.545600 | 0.001991  |
| Au | -2.106753 | 0.971486  | -0.001001 |
| Au | 2.099961  | 1.264846  | -0.000073 |
| Li | 2.131295  | -1.270821 | 0.002482  |
| Li | -0.047516 | 0.667295  | -1.334512 |
| Li | -0.048406 | 0.670575  | 1.334243  |
| C  | 1.696213  | -3.283141 | -0.003406 |
| O  | 1.354455  | -4.383763 | -0.007327 |

$n = 4$

|    |           |           |           |
|----|-----------|-----------|-----------|
| Au | 0.093055  | 2.043790  | 1.405182  |
| Au | -2.459145 | -0.002089 | -1.030016 |
| Au | 1.550094  | -0.004784 | -1.792561 |
| Au | 0.092543  | -2.037059 | 1.415097  |
| Li | 1.558728  | 0.001638  | 0.818685  |
| Li | -0.392762 | 1.500417  | -1.036070 |
| Li | -0.393490 | -1.505470 | -1.028791 |
| Li | -1.442932 | 0.003383  | 1.322850  |
| C  | 3.626255  | 0.001069  | 0.250468  |
| O  | 4.675828  | 0.000605  | -0.193910 |

$n = 5$

|    |           |           |           |
|----|-----------|-----------|-----------|
| Au | 2.087579  | 1.954747  | -0.234687 |
| Au | -1.681972 | 1.779384  | -1.185683 |
| Au | -0.523831 | 0.012852  | 2.104809  |
| Au | 2.248480  | -1.784067 | -0.162401 |
| Au | -1.507745 | -1.978376 | -1.115016 |
| Li | 2.069681  | 0.113603  | 1.430731  |
| Li | -0.170743 | 2.283162  | 0.720628  |
| Li | 0.342966  | -0.011721 | -1.043336 |
| Li | -2.471583 | -0.115395 | 0.255100  |
| Li | 0.028100  | -2.268356 | 0.816389  |
| C  | -3.238190 | 0.040046  | 2.270741  |
| O  | -3.643073 | 0.122143  | 3.335291  |

$n = 6$

|    |           |           |           |
|----|-----------|-----------|-----------|
| Au | -2.322051 | -2.488332 | -0.001591 |
| Au | 0.008745  | 0.087181  | 2.146661  |
| Au | -2.783910 | 1.642547  | 0.001423  |
| Au | 0.007202  | 0.094241  | -2.144886 |
| Au | 2.604138  | 2.043640  | 0.000855  |
| Au | 2.696734  | -2.093366 | -0.002807 |
| Li | -2.405430 | -0.421277 | 1.442965  |
| Li | 0.134401  | -1.557570 | -0.001787 |
| Li | -0.044687 | 1.652782  | 0.003291  |
| Li | -2.406298 | -0.419449 | -1.443275 |
| Li | 2.479487  | -0.022501 | -1.437394 |
| Li | 2.480346  | -0.024907 | 1.435467  |
| C  | -0.966401 | 3.606475  | 0.002553  |
| O  | -1.446607 | 4.644103  | 0.001784  |

$n = 7$

|    |           |           |           |
|----|-----------|-----------|-----------|
| Au | -1.816284 | -2.481631 | 1.760964  |
| Au | -2.406844 | -0.023669 | -1.870459 |
| Au | 0.008372  | -0.008164 | -0.209328 |

|    |           |           |           |
|----|-----------|-----------|-----------|
| Au | 2.609400  | 0.029066  | 2.160459  |
| Au | 1.224928  | -2.156409 | -1.731554 |
| Au | -1.773058 | 2.584827  | 1.647337  |
| Au | 1.260598  | 2.058299  | -1.812576 |
| Li | -2.164861 | 0.042627  | 1.168054  |
| Li | 0.611121  | -1.590408 | 1.692699  |
| Li | -1.265105 | -2.206112 | -0.727464 |
| Li | 2.555645  | -0.038253 | -0.505475 |
| Li | 0.082397  | -0.061002 | -2.826523 |
| Li | -1.232250 | 2.186944  | -0.825373 |
| Li | 0.642784  | 1.659790  | 1.607235  |
| C  | 4.601372  | -0.019997 | 0.150698  |
| O  | 5.655090  | -0.005492 | 0.587981  |

$n = 8$

|    |           |           |           |
|----|-----------|-----------|-----------|
| Au | 2.445707  | -2.103728 | 1.726298  |
| Au | 2.733150  | 1.783946  | 0.324964  |
| Au | 1.178436  | -1.174824 | -2.408085 |
| Au | 0.056606  | 0.322614  | -0.042922 |
| Au | -1.908393 | -3.028207 | 0.003237  |
| Au | -0.622957 | 3.145427  | -1.421013 |
| Au | -0.973857 | 1.492155  | 2.591215  |
| Au | -3.729578 | -0.180606 | -0.363609 |
| Li | 2.827794  | -0.731676 | -0.392402 |
| Li | 1.353830  | 0.166943  | 2.177924  |
| Li | 0.502423  | -2.374631 | 0.058297  |
| Li | 0.430128  | 2.838725  | 0.864477  |
| Li | 1.261283  | 1.456608  | -1.985105 |
| Li | -2.222476 | 1.753810  | 0.074092  |
| Li | -1.593079 | -1.022636 | -1.572198 |
| Li | -1.925567 | -0.832510 | 1.338765  |
| C  | 4.153657  | -1.469821 | -1.940063 |
| O  | 4.753133  | -1.903811 | -2.805985 |

$n = 9$

|    |           |           |           |
|----|-----------|-----------|-----------|
| Au | 2.911221  | -0.919228 | -2.031857 |
| Au | 0.191597  | -1.679857 | 2.342826  |
| Au | 2.939553  | -0.536300 | 2.127636  |
| Au | 0.161786  | -2.080929 | -1.990799 |
| Au | -0.703127 | 0.012396  | 0.009339  |
| Au | 2.070676  | 2.719831  | -0.254379 |
| Au | -3.474253 | -1.129117 | 0.120499  |
| Au | -1.702472 | 2.349061  | 2.028579  |
| Au | -1.716232 | 1.951694  | -2.391960 |
| Li | 1.619303  | -1.476013 | 0.125855  |
| Li | 0.999173  | 1.086502  | 1.681227  |

|    |           |           |           |
|----|-----------|-----------|-----------|
| Li | 3.607904  | 0.588412  | -0.078041 |
| Li | -1.209615 | -2.651624 | 0.264632  |
| Li | 0.976718  | 0.764108  | -1.854862 |
| Li | -1.958999 | -0.259765 | 2.274900  |
| Li | -1.976253 | -0.657644 | -2.161267 |
| Li | -0.448438 | 2.690301  | -0.235829 |
| Li | -2.932917 | 1.453413  | -0.113443 |
| C  | -3.003857 | -3.847537 | 0.251183  |
| O  | -3.953577 | -4.480553 | 0.244066  |

### Top adsorptions

$n = 1$

|    |           |           |           |
|----|-----------|-----------|-----------|
| Au | -0.323828 | -0.079362 | -0.000004 |
| Li | -2.222650 | 1.381214  | 0.000048  |
| C  | 1.820435  | -0.297997 | 0.000069  |
| O  | 2.665965  | 0.489246  | -0.000026 |

$n = 2$

|    |           |           |           |
|----|-----------|-----------|-----------|
| Au | 1.774122  | -0.313842 | 0.000448  |
| Au | -2.459915 | 0.118217  | -0.000161 |
| Li | -0.396731 | -0.117825 | 1.315362  |
| Li | -0.397773 | -0.129649 | -1.315019 |
| C  | 3.854640  | 0.525753  | -0.000726 |
| O  | 4.179168  | 1.630283  | -0.002424 |

$n = 3$

|    |           |           |           |
|----|-----------|-----------|-----------|
| Au | -2.425318 | -1.074090 | 0.000305  |
| Au | 1.896443  | -0.467113 | -0.003529 |
| Au | -0.079990 | 1.861317  | 0.001331  |
| Li | -2.482680 | 1.435600  | 0.002630  |
| Li | -0.295895 | -0.348740 | 1.304333  |
| Li | -0.301398 | -0.346021 | -1.304888 |
| C  | 3.899222  | -1.334381 | 0.007272  |
| O  | 4.243106  | -2.438163 | 0.012463  |

$n = 4$

|    |           |           |           |
|----|-----------|-----------|-----------|
| Au | 0.780620  | 1.346026  | -2.026401 |
| Au | 0.750477  | 1.337956  | 2.038732  |
| Au | -2.309588 | -0.630287 | -0.018958 |
| Au | 1.612107  | -2.079937 | 0.006333  |
| Li | -0.136225 | -0.970575 | -1.481525 |
| Li | -0.775297 | 1.474339  | -0.004938 |

|    |           |           |           |
|----|-----------|-----------|-----------|
| Li | -0.158538 | -0.976599 | 1.472304  |
| Li | 2.039141  | 0.446080  | 0.013787  |
| C  | -4.566793 | -0.405119 | -0.012695 |
| O  | -5.170269 | 0.573012  | 0.012568  |

$n = 5$

|    |           |           |           |
|----|-----------|-----------|-----------|
| Au | -2.146045 | -1.895540 | -0.222760 |
| Au | 1.605482  | -1.885906 | -1.136054 |
| Au | 0.428856  | 0.000193  | 2.135401  |
| Au | -2.146862 | 1.895333  | -0.222923 |
| Au | 1.605738  | 1.885665  | -1.136624 |
| Li | -2.129282 | -0.000006 | 1.379702  |
| Li | 0.087643  | -2.292745 | 0.783366  |
| Li | -0.341137 | 0.000021  | -1.009306 |
| Li | 2.413473  | -0.000107 | 0.293795  |
| Li | 0.087381  | 2.292787  | 0.782181  |
| C  | 3.408048  | 0.001037  | 2.211564  |
| O  | 3.846385  | 0.001761  | 3.261908  |

$n = 6$

|    |           |           |           |
|----|-----------|-----------|-----------|
| Au | 2.308514  | -2.089397 | 0.351672  |
| Au | -0.156491 | -1.137656 | -1.252973 |
| Au | 2.710802  | 1.850952  | -0.871674 |
| Au | 0.294347  | 1.001181  | 2.244298  |
| Au | -2.311895 | 2.320194  | -0.544348 |
| Au | -2.517477 | -1.663833 | 0.687923  |
| Li | 2.251939  | -0.483962 | -1.677747 |
| Li | -0.003362 | -1.413824 | 1.321114  |
| Li | 0.148791  | 1.441370  | -0.440883 |
| Li | 2.542722  | 0.303251  | 1.126954  |
| Li | -2.171276 | 0.730533  | 1.408448  |
| Li | -2.493184 | -0.062990 | -1.408799 |
| C  | -2.056549 | -1.293461 | -3.044872 |
| O  | -1.797974 | -2.002019 | -3.911870 |

$n = 7$

|    |           |           |           |
|----|-----------|-----------|-----------|
| Au | 0.417977  | -2.194967 | 2.694794  |
| Au | 0.012207  | -2.350571 | -1.979330 |
| Au | 0.108385  | -0.066880 | -0.192867 |
| Au | -0.097108 | 2.817639  | 1.983482  |
| Au | 2.917294  | 0.229165  | -0.359118 |
| Au | -3.647809 | -0.325828 | 0.228277  |
| Au | -0.657270 | 1.800106  | -2.283690 |
| Li | -1.562433 | -1.549408 | 1.135673  |
| Li | 0.698789  | 0.360605  | 2.244444  |
| Li | 1.409519  | -2.164814 | 0.327519  |



|    |           |           |           |
|----|-----------|-----------|-----------|
| Li | 1.042536  | 2.317430  | -0.249734 |
| Li | 1.249711  | -0.074352 | -2.495462 |
| Li | -1.976118 | -0.529106 | -1.700386 |
| Li | -1.829626 | 1.524797  | 0.502759  |
| C  | 5.075564  | 0.307419  | -0.066187 |
| O  | 5.901129  | 0.714452  | -0.766205 |

$n = 8$

|    |           |           |           |
|----|-----------|-----------|-----------|
| Au | -0.848428 | 3.001405  | 1.271409  |
| Au | -3.231045 | 0.212431  | 0.035288  |
| Au | 0.054011  | 1.480795  | -2.720756 |
| Au | -0.258200 | 0.191630  | 0.125504  |
| Au | 3.430910  | 1.554761  | 0.012955  |
| Au | -1.179822 | -3.261206 | -1.257941 |
| Au | -0.129943 | -1.481401 | 2.647745  |
| Au | 3.218826  | -1.783050 | -0.045279 |
| Li | -1.718042 | 2.134581  | -0.954730 |
| Li | -1.589918 | 0.682825  | 2.241826  |
| Li | 1.151448  | 2.488297  | -0.317931 |
| Li | -1.896947 | -1.928814 | 0.776980  |
| Li | -1.204972 | -0.819077 | -2.015556 |
| Li | 0.806591  | -2.396790 | 0.154321  |
| Li | 1.987279  | -0.002991 | -1.411691 |
| Li | 2.036419  | -0.068209 | 1.464983  |
| C  | -5.306504 | 0.701336  | -0.619516 |
| O  | -6.290605 | 0.276094  | -0.192818 |

$n = 9$

|    |           |           |           |
|----|-----------|-----------|-----------|
| Au | -2.689147 | -2.210747 | -1.120729 |
| Au | -0.797271 | 2.622198  | -0.681376 |
| Au | -3.144758 | 1.485859  | 0.793233  |
| Au | -0.325737 | -1.204302 | -2.662872 |
| Au | 0.762745  | 0.083886  | -0.148981 |
| Au | -1.204501 | -1.605500 | 2.644259  |
| Au | 3.130739  | 1.161443  | -1.667136 |
| Au | 2.017790  | 1.368865  | 2.522659  |
| Au | 2.500888  | -2.549634 | 0.493881  |
| Li | -1.872772 | 0.234481  | -1.068057 |
| Li | -0.819169 | 0.951006  | 1.743345  |
| Li | -3.243795 | -1.051815 | 1.089694  |
| Li | 0.570314  | 1.282361  | -2.510301 |
| Li | -0.426584 | -2.231676 | 0.094877  |
| Li | 1.630186  | 2.526325  | 0.165414  |
| Li | 2.109726  | -1.367787 | -1.850509 |
| Li | 1.223841  | -1.094968 | 2.236088  |
| Li | 3.274157  | -0.033013 | 0.673266  |

|   |           |          |           |
|---|-----------|----------|-----------|
| C | -1.630087 | 4.202682 | -1.002420 |
| O | -2.170777 | 5.515728 | -1.171135 |
